# Supplementary material for: Automated fitting of transition state force fields for biomolecular simulations
Source: PubMed Central journal article supplement (PMC8912266; doi:10.1371/journal.pone.0264960), 2022-03-10
Supplement: pone.0264960.s006.pdf [file pone.0264960.s006.pdf]

Comparison of bond distances (A), bond angles (B), dihedral angles (C) and Hessian matrix elements (D) from electronic structure calculations and fitted TSFF

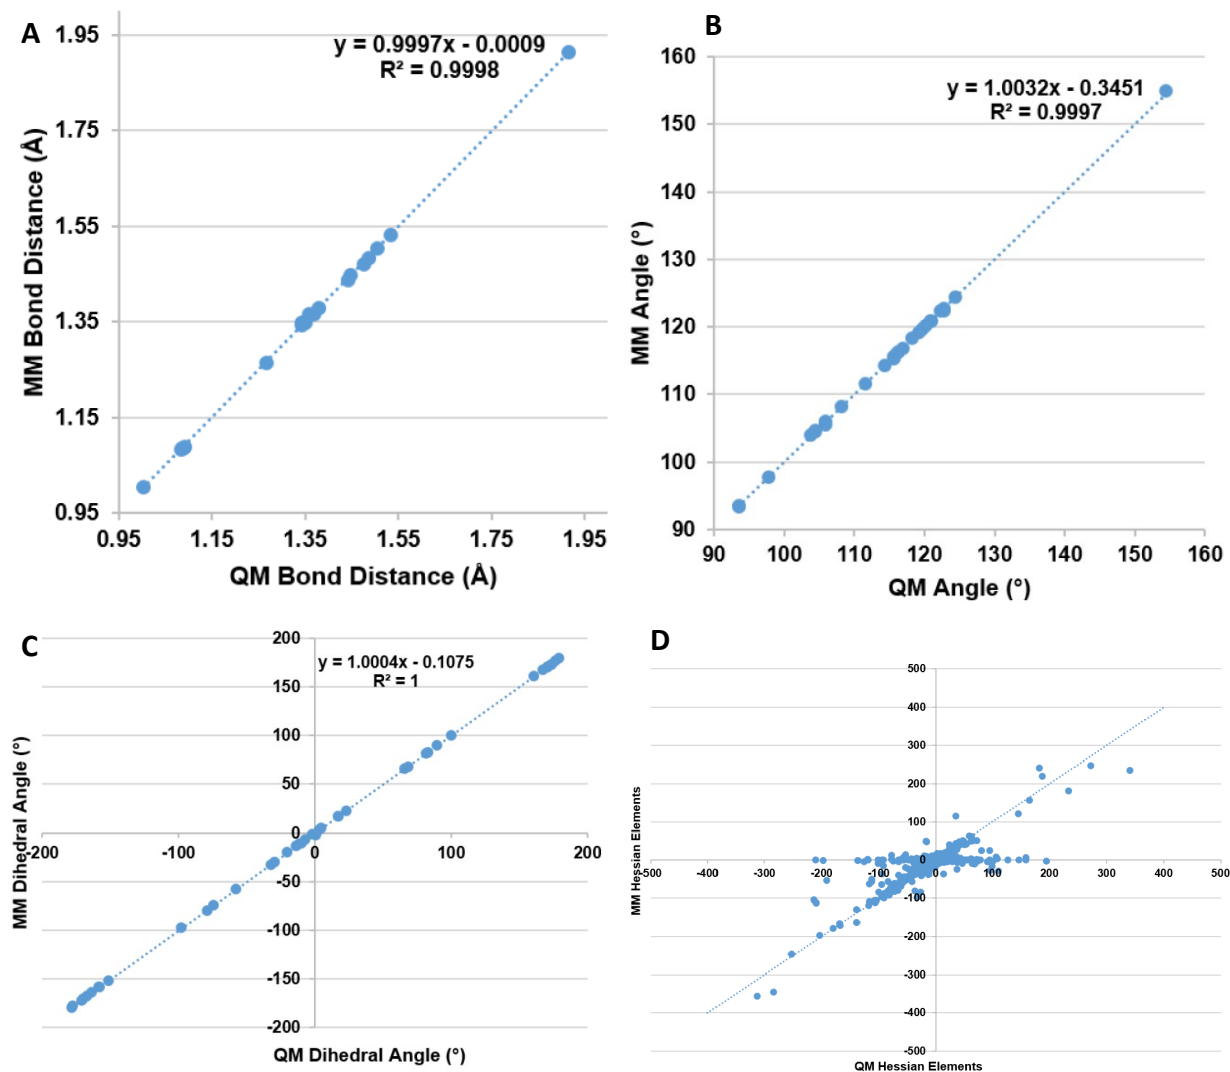

Note that there are a significant number of hessian matrix elements that are set to 0 in the optimized TSFF. For details, see [1, 2]

1. Norrby P-O, Liljefors T. Automated molecular mechanics parameterization with simultaneous utilization of experimental and quantum mechanical data. *J Comp Chem.* 1998;19:1146-66.
2. Limé E, Norrby P-O. Improving the Q2MM method for transition state force field modeling. *J Comp Chem.* 2015;36:244-50.
